## VENTILATORY RESPONSES TO CARBOXYHAEMOGLOBINAEMIA AND HYPOXIC HYPOXIA IN *BUFO PARACNEMIS*

LUIZ G. S. BRANCO<sup>1</sup> AND MOGENS L. GLASS<sup>2</sup>

<sup>1</sup>Department of Physiology, Faculty of Odontology of Ribeirão Preto and <sup>2</sup>Department of Physiology, Faculty of Medicine of Ribeirão Preto, University of São Paulo, Ribeirão Preto, SP, Brazil

Accepted 6 March 1995

### Summary

The modality of the O<sub>2</sub> drive to breathe was evaluated in unanaesthetized *Bufo paracnemis*. Carbon monoxide (CO) hypoxia was applied to reduce CaO<sub>2</sub> (arterial O<sub>2</sub> content). Arterial P<sub>O<sub>2</sub></sub> (PaO<sub>2</sub>) was reduced through inspiration of hypoxic gas mixtures (hypoxic hypoxia). Measurements included pulmonary ventilation, CaO<sub>2</sub>, PaO<sub>2</sub>, pH<sub>a</sub>, blood pressure and heart rate. Application of fractional concentrations of CO equivalent to 0.001 reduced CaO<sub>2</sub> from 11.6±1.2 to 8.6±0.7 vol% (mean ± S.E.M., N=6) without any effect on heart rate, blood pressure or ventilation. Inspiration of fractional concentrations of CO equivalent to 0.01 reduced CaO<sub>2</sub> to 5.1±0.7 vol%, which was accompanied by increased ventilation. This response,

however, correlated with a decreased arterial pH. The effect of a fractional concentration of CO of 0.01 on ventilation was abolished by compensation of pH through bicarbonate infusion. Consequently, carboxyhaemoglobinaemia *per se* failed to increase ventilation. By contrast, reductions of PaO<sub>2</sub> clearly stimulated ventilation, which indicates that O<sub>2</sub> partial pressure provides the principal O<sub>2</sub> stimulus to breathe in *Bufo paracnemis*.

Key words: *Bufo paracnemis*, control of ventilation, O<sub>2</sub> receptor, blood oxygen-carrying capacity, hypoxia, carboxyhaemoglobinaemia, blood pressure.

### Introduction

Most early studies on pulmonary ventilation in amphibians focused on the mechanics of pulmonary ventilation: the mechanism behind the positive pressure inflation of the lungs (DeJongh and Gans, 1969; Jones, 1982). In addition, the periodic pattern of ventilation was described as breath-holding alternating with bursts of pulmonary ventilation, which in some anuran amphibians are initiated by stepwise pulmonary deflation followed by lung reinflation (Boutilier, 1984; Shelton and Boutilier, 1982).

Recently, studies have evaluated the chemical drive to breathe and the receptors involved. The ventilatory responses to hypoxia and change of temperature were assessed in *Bufo paracnemis* (Kruhøffer *et al.* 1987), and other studies characterized the arterial O<sub>2</sub> receptors (Ishii *et al.* 1985; Van Vliet and West, 1992). In addition, central acid–base receptors have been documented in *Bufo marinus* (Smatresk and Smits, 1991) and *Bufo paracnemis* (Branco *et al.* 1992, 1993). The central chemosensitivity of *Bufo marinus* depends on alterations of pH and/or CO<sub>2</sub> levels (Smatresk and Smits, 1991). The O<sub>2</sub> stimulus to breathe has also been evaluated in *Bufo paracnemis* (Wang *et al.* 1994), with the conclusion that pulmonary ventilation is modulated by changes of arterial P<sub>O<sub>2</sub></sub> and not by CaO<sub>2</sub> of the blood. The experimental approach used in that study (bleeding with Ringer substitution) can, however,

be criticized since cardiovascular alterations occurred. To avoid this problem, the present study applies reductions of CaO<sub>2</sub> by formation of carboxyhaemoglobin instead of bleeding. The animals were exposed to CO hypoxia and/or to reductions of inspired P<sub>O<sub>2</sub></sub>. The effects on blood variables were measured, and the ventilatory responses recorded together with changes in arterial blood pressure and heart rate.

### Materials and methods

Toads, *Bufo paracnemis* (Lutz) (mass 160–510 g, N=27), were collected at the Campus of the University of São Paulo in Ribeirão Preto from November to January (summer season). The toads were maintained in containers with free access to water and a basking area (temperature 25–27 °C). Food was withheld during the 4 days preceding surgery.

#### *Surgical procedure and anaesthesia*

Arterial cannulation was performed as described in detail by Boutilier *et al.* (1979). A PE 50 catheter was occlusively inserted into the right femoral artery, after which skin incisions were closed and the catheter secured. This procedure was performed within 15 min, during which ether anaesthesia was applied. For initial anaesthesia, the toad was placed in a closed

box saturated with ether vapour. During surgery, ether was evaporated from cotton pads placed under the belly. The first indications of recovery were observed within a few minutes after removal of ether, and complete recovery was apparent after a few hours. Experiments were initiated 24 h after surgery.

#### *Ventilation and blood pressure measurements*

Pulmonary ventilation was measured directly using a pneumotachographic method described by Glass *et al.* (1978). Briefly, a light-weight face mask was constructed for each toad. Initially, an alginate resin was used to obtain a negative impression of the head, and then a positive plaster cast was made for moulding the masks (Bioplast, Scheu-Dental, Iserlohn, Germany). The masks were placed on the toads and provided an airtight fit between the nostrils and a Fleisch tube. A direct relationship exists between laminar air flow and pressure difference across this tube (Fleisch, 1925; Grenvik *et al.* 1966). The latter was monitored by a highly sensitive differential air pressure transducer (Statham, 12123) connected to a Narco four-channel recorder (Narco Bio-systems, Inc., Houston, Texas, USA; type 7179; model 4-A). Calibration was performed according to recommended routines by passing known volumes of gas through the pneumotachograph (for details, see Hobbes, 1967).

The arterial cannula was connected to a Statham pressure transducer (P23Dd) kept at the same level as the animal's heart. A mercury column was used to calibrate the signals of this transducer before and after the experiment.

#### *Blood gas analysis*

Immediately after withdrawal, arterial blood samples were analyzed for  $P_{O_2}$  and pH using a FAC 204A  $O_2$  analyzer (FAC Instruments, São Carlos, Brazil) and a Micronal B374 pH meter (São Paulo, Brazil). Electrodes were kept at the experimental temperature. Oxygen electrodes were calibrated with pure  $N_2$  and humidified atmospheric air. The pH electrode was adjusted using high-precision buffers: S1500 and S1510; Radiometer, Copenhagen, Denmark (see Siggaard-Andersen, 1976, for exact composition and calibration values at different temperatures). Arterial  $O_2$  content,  $Ca_{O_2}$ , was measured according to the micromethod of Tucker (1967). Blood  $P_{CO_2}$  was estimated using the Astrup technique (Astrup, 1956). This involves equilibration of blood samples with gas mixtures of known  $P_{CO_2}$ , after which the  $\log P_{CO_2}/pH$  relationship is plotted for each animal. The  $P_{CO_2}$  of the blood samples can then be interpolated from this relationship. Standard calibration gases (AGA, Brazil) with fractional  $CO_2$  concentrations of 0.01, 0.03 and 0.06 were used for equilibration.

#### *Experimental protocol*

The fully recovered toad was equipped with a face mask and left undisturbed for 2 or 3 h in a chamber (volume 2 l) supplied with a continuous flux of humidified air ( $51 \text{ min}^{-1}$ ). After this control period, hypoxic gas mixtures (fractional concentrations,  $FO_2$ , of 0.10 and 0.05) were prepared by

mixing pure nitrogen with air. Relative flow rates (air and  $N_2$ ) were controlled by means of precision needle valves. After humidification, the resulting mixture entered the chamber. Its concentration was continuously monitored using a Beckman OM-11 oxygen analyzer. All exposures to test gases were applied for 45 min, at the end of which ventilation was recorded and arterial blood withdrawn. Subsequently, known quantities of pure CO were mixed into the animal chamber to provide initial fractional concentrations of 0.001 or 0.01. To achieve this, 2 or 20 ml of air, respectively, was withdrawn from the 2 l animal chamber and replaced with pure CO. The resulting CO exposure was maintained for 30 min. After this treatment, the chamber was flushed with fresh air for 45 min. Then the series of hypoxic exposures was repeated along with measurements of ventilation and analysis of blood samples. In some experiments, inspiration of  $FCO=0.01$  was accompanied by bicarbonate infusion to keep pH values constant. This was accomplished by infusion of  $NaHCO_3$  at  $1 \text{ mmol kg}^{-1}$  body mass into the dorsal lymph sac. This quantity was previously determined using stepwise  $NaHCO_3$  infusion, accompanied by blood sampling. For more details concerning compensation of pH, see Siggaard-Andersen (1976).

#### *Data analysis*

Pulmonary ventilation was distinguished from buccal movements by a biphasic flow profile during expiration (Jones, 1982) and ventilation was calculated excluding buccal movements. Ventilation, blood pressure and heart rate were calculated on the basis of 10 min recording periods. Tidal volume was obtained from the integrated area of the expired flow signal. Effects of hypoxic hypoxia and CO treatment were evaluated using analysis of variance (ANOVA) and the difference between means was assessed by Tuckey's test. A  $P$  value of less than 0.05 was considered significant.

## **Results**

Table 1 shows the data for the effects of hypoxic hypoxia and/or CO hypoxia on  $Ca_{O_2}$  of the arterial blood. Hypoxic hypoxia down to  $FO_2=0.05$  reduced  $Ca_{O_2}$  of the blood by about 50%. CO hypoxia decreased  $Ca_{O_2}$  by the same amount when  $FCO=0.01$  was inspired. By combining the treatments of hypoxic hypoxia (inspired  $FO_2=0.05$ ) and CO hypoxia ( $FCO=0.01$ ),  $Ca_{O_2}$  declined to 30% of the normoxic control value.

Table 2 shows the effects of treatments on blood pressure, heart rate and blood gases. None of the experimental conditions had any significant effect on mean arterial pressure. Heart rate rose during hypoxic hypoxia, but was not affected by CO hypoxia. Hypoxic hypoxia ( $FO_2=0.05$ ) reduced  $Pa_{O_2}$  to 30% of the normoxic control value. Carboxyhaemoglobinaemia did not affect  $Pa_{O_2}$ . Arterial pH increased during hypoxic hypoxia as a result of hyperventilation (Fig. 1). Treatment with  $FCO=0.01$  caused a reduction of pHa. In some experiments, this reduction was

Table 1. Effects of hypoxic hypoxia and/or CO hypoxia on oxygen content of the arterial blood of *Bufo paracnemis*

| $FO_2$ | Oxygen content (vol%) |             |            |                    |
|--------|-----------------------|-------------|------------|--------------------|
|        | Control               | $FCO=0.001$ | $FCO=0.01$ | $FCO=0.01+HCO_3^-$ |
| 0.21   | 11.6±1.2              | 8.6±0.7†    | 5.1±0.7†   | 5.6±1.2†           |
| 0.10   | 8.7±0.8*              | 6.5±0.5*†   | 6.5±0.5†   | 4.7±0.5†           |
| 0.05   | 6.2±0.7*              | 5.1±0.7*†   | 3.6±0.7*†  | 3.5±0.7*†          |

Values are mean ± S.E.M. (N=6).  
 \*A significant effect of hypoxic hypoxia relative to normoxic control group.  
 †A significant effect of CO hypoxia.

compensated by bicarbonate infusion. Arterial  $P_{CO_2}$  was not influenced by inspiration of  $FCO=0.01$ .

Fig. 1 shows the effects of hypoxic and CO hypoxia on pulmonary ventilation. Hypoxic hypoxia was accompanied by marked increases of ventilation. Inspiration of CO at low levels ( $FCO=0.001$ ) did not affect ventilation which, however, increased slightly at the higher level ( $FCO=0.01$ ). This increase did not occur when arterial pH was controlled through bicarbonate infusion.

### Discussion

Studies on the carotid bodies of mammals indicate that  $O_2$  partial pressure is the specific stimulus modulator for the  $O_2$  receptor (Mills and Edwards, 1968; Garland *et al.* 1994). The transducer mechanism may involve cytochrome  $a_3^{2+}$  (Larihi, 1994). Participation of  $O_2$ -sensitive  $K^+$  channels is also suggested (López-Barneo *et al.* 1993; López-López *et al.*

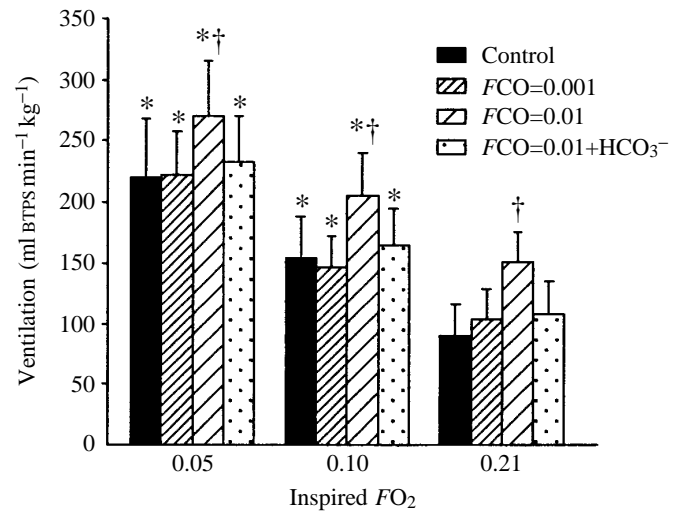

Fig. 1. The effects of hypoxic hypoxia and CO hypoxia on pulmonary ventilation. Hypoxic hypoxia was accompanied by marked increases of ventilation. Inspiration of CO at low levels ( $FCO=0.001$ ) did not affect ventilation. However, ventilation increased slightly at the higher level ( $FCO=0.01$ ). This increase disappeared when arterial pH was controlled through bicarbonate infusion. Mean values + S.E.M. (N=6). \* denotes a significant effect of hypoxic hypoxia relative to normoxic control values; † denotes a significant effect of CO hypoxia.

1989). A complete and consistent picture is, however, not yet available in spite of considerable recent progress (see Lahiri, 1994). The final stimulus modulator may be  $P_{O_2}$ , but receptor function depends on blood flow and oxygen delivery to the receptor site. If blood flow is relatively low, then the output from the receptor becomes dependent on  $CaO_2$ , which has been documented for the aortic  $O_2$  receptors of the cat (Lahiri *et al.*

Table 2. Effects of reduction in  $CaO_2$  and hypoxic hypoxia on mean arterial pressure, heart rate and blood gases in *Bufo paracnemis*

| Group              | $FO_2$ | Mean arterial pressure (kPa) | Heart rate ( $min^{-1}$ ) | $Pa_{O_2}$ (kPa) | pHa         | $Pa_{CO_2}$ (kPa) |
|--------------------|--------|------------------------------|---------------------------|------------------|-------------|-------------------|
| Control            | 0.21   | 5.3±0.6                      | 37.1±3.1                  | 9.3±0.4          | 7.81±0.02   | 1.3±0.1           |
|                    | 0.10   | 5.6±0.8                      | 41.9±3.2*                 | 5.4±0.5*         | 7.91±0.01*  | 1.0±0.1*          |
|                    | 0.05   | 6.0±1.0                      | 52.7±3.6*                 | 3.4±0.3*         | 7.96±0.02*  | 0.8±0.1*          |
| $FCO=0.001$        | 0.21   | 5.2±0.8                      | 39.8±4.0                  | 9.2±0.7          | 7.81±0.04   | —                 |
|                    | 0.10   | 5.5±0.5                      | 39.6±4.1                  | 5.8±0.6*         | 7.92±0.04*  | —                 |
|                    | 0.05   | 6.1±0.7                      | 47.2±4.4*                 | 3.9±0.7*         | 7.97±0.04*  | —                 |
| $FCO=0.01$         | 0.21   | 5.3±0.4                      | 38.3±4.8                  | 9.9±0.5          | 7.65±0.03†  | 1.4±0.1           |
|                    | 0.10   | 5.7±0.6                      | 39.5±5.1                  | 5.0±0.6*         | 7.79±0.06*† | 0.8±0.4*          |
|                    | 0.05   | 6.1±0.7                      | 51.5±5.8*                 | 3.9±0.6*         | 7.83±0.04*† | 0.7±0.1*          |
| $FCO=0.01+HCO_3^-$ | 0.21   | 5.4±0.9                      | 36.8±3.8                  | 9.1±0.7          | 7.85±0.04   | —                 |
|                    | 0.10   | 5.8±0.7                      | 42.0±3.7*                 | 5.2±0.6*         | 7.88±0.06   | —                 |
|                    | 0.05   | 6.0±0.9                      | 47.0±5.4*                 | 3.5±0.5*         | 7.92±0.04*  | —                 |

Values are mean + S.E.M. (N=6).

\*A significant effect of hypoxic hypoxia relative to the normoxic control group.

†A significant effect of CO hypoxia.

1981). Conversely, carotid O<sub>2</sub> receptors are heavily perfused and their output strongly depends on O<sub>2</sub> partial pressure; they are largely unaffected by carboxyhaemoglobinaemia (Lahiri *et al.* 1981). This implies that the final O<sub>2</sub> modulator ( $P_{O_2}$ ) is masked unless the receptor site is heavily perfused and, thus, perfusion characteristics determine the apparent arterial O<sub>2</sub> stimulus ( $P_{O_2}$  or [O<sub>2</sub>]).

In vertebrates, the apparent O<sub>2</sub> stimulus to breathe has been most widely studied in mammals and, according to the traditional view, their O<sub>2</sub> drive to breathe depends on arterial O<sub>2</sub> partial pressure rather than on CaO<sub>2</sub> (cf. Comroe, 1974). In a recent study, Garland *et al.* (1994) reported a considerable ventilatory response to carboxyhaemoglobinaemia in squirrels and rats. The ventilatory responses to hypoxic hypoxia seem to exceed those to CO hypoxia in both species. Increases of ventilation in response to CO hypoxia have also been reported for cats and goats (Santiago and Edelman, 1976; Gautier and Bonora, 1983; Gautier *et al.* 1990). It is not yet possible to relate these responses to the relative contributions from carotid and aortic receptor groups.

Information is scarce for other vertebrate classes. Positive evidence for a dependence of ventilation on CaO<sub>2</sub> has been obtained for birds (Tschorn and Fedde, 1974) and teleost fish (Smith and Jones, 1982). Corresponding data are few for reptiles and amphibians. Studying the toad *Bufo paracnemis*, Wang *et al.* (1994) reduced CaO<sub>2</sub> by replacing blood with Ringer's solution. Ventilation is unaffected by this treatment, whereas decreases of arterial  $P_{O_2}$  stimulate ventilation. This anaemia is, however, accompanied by tachycardia and probably also by viscosity changes, and this complicates interpretation of the results. An increased heart rate may partially restore O<sub>2</sub> delivery to receptor sites (Lahiri *et al.* 1981). In the present study, we reduced CaCO<sub>2</sub> by applying CO hypoxia and thus avoided cardiovascular side effects. Moreover, we controlled acid–base status through bicarbonate infusion. Because of these precautions, the reduction of CaO<sub>2</sub> was not accompanied by significant stimulation of ventilation. It therefore seems justifiable to conclude that the O<sub>2</sub> drive in *Bufo paracnemis* is, indeed, linked to changes of O<sub>2</sub> partial pressure and is largely independent of CaO<sub>2</sub>. The possibility that very severe reductions of CaO<sub>2</sub> may, eventually, cause ventilatory responses cannot be excluded. Furthermore, it should be noted that recent work suggests the possibility that CO is an atypical neurotransmitter (Snyder, 1992). Such a role for CO may complicate the interpretation of data obtained by application of CO hypoxia (Garland *et al.* 1994). Carbon monoxide has been used as a probe to study *in vitro* the sensor mechanism of mammalian O<sub>2</sub> receptors (Lahiri, 1994). The receptors were excited when very high levels of CO were applied (6.67 kPa=500 mmHg). These findings cannot be applied directly to the present study because of differences in experimental protocols and levels of CO at the receptor site.

An increase of heart rate during hypoxic hypoxia was reported for *Bufo marinus* (Boutilier and Toews, 1977). The increase was, however, marginal, and severe hypoxia caused a pronounced bradycardia relative to normoxic control values.

Recently, Wang *et al.* (1994) observed a progressive increase of heart rate with reduction of inspired  $P_{O_2}$ , which is consistent with the present results. The present blood gas data agree well with previous studies on *Bufo paracnemis* (Kruhøffer *et al.* 1987; Branco *et al.* 1993; Wang *et al.* 1994) and *Bufo marinus* (Boutilier *et al.* 1987; Wood and Malvin, 1991). The observation that  $P_{CO_2}$  was not altered by CO hypoxia indicates that the reduction of pH during treatment with  $FCO=0.01$  was due to a metabolic acidosis. Our ventilation data are also in close agreement with earlier measurements on *Bufo paracnemis* at 25 °C (Kruhøffer *et al.* 1987; Branco *et al.* 1992; Wang *et al.* 1994).

A number of studies report on peripheral O<sub>2</sub> receptors in anuran amphibians. Ishii *et al.* (1966, 1985) located such receptors in the carotid labyrinth as well as in the aortic arch. Recently, Van Vliet and West (1992) managed to record the afferent neural activity from these regions, applying reductions of CaO<sub>2</sub> as well as alterations of  $P_{O_2}$ . They concluded that the output is related to changes of  $P_{O_2}$ , which is consistent with the data on the ventilatory drive (Wang *et al.* 1994; present study). This suggests that the O<sub>2</sub> receptors that dominate the hypoxic response are not situated in O<sub>2</sub>-demanding tissue but instead in a well-perfused region.

Anuran amphibians seem to share some essential features of ventilatory control with mammals: in both vertebrate classes, the O<sub>2</sub> drive to breathe depends on peripheral receptors. Moreover, ventilatory acid–base regulation is based on central chemoreceptors, backed up by a peripheral component (Smatresk and Smits, 1991; Branco *et al.* 1992). These common characteristics seem unexpected and are intriguing, considering the large evolutionary distance between the groups, the very different mechanism of pulmonary ventilation employed by the two groups and the high dependence on cutaneous respiration in amphibians.

This study was supported by an equipment grant (94/1239-4) from FAPESP (Fundação de Amparo à Pesquisa do Estado de São Paulo). CNPq (Conselho Nacional de Desenvolvimento Científico e Tecnológico) provided research support to the authors (521995/94-9 and 520769/93-7). We also thank Dr Geraldo M. Campos for advice on statistics and FAEPA (Fundação de Apoio ao Ensino, Pesquisa e Assistência, do Hospital das Clínicas, da Faculdade de Medicina de Ribeirão Preto/USP) for financial support.

## References

- ASTRUP, P. (1956). A simple electrometric technique for the determination of carbon dioxide tension in blood and plasma, total content of carbon dioxide in plasma and bicarbonate content in 'separated' plasma at a fixed carbon dioxide tension (40 mmHg). *Scand. J. clin. Invest.* **8**, 33–43.
- BOUTILIER, R. G. (1984). Characterization of the intermittent breathing in *Xenopus laevis*. *J. exp. Biol.* **110**, 291–309.
- BOUTILIER, R. G., GLASS, M. L. AND HEISLER, N. (1987). Blood gases and extracellular/intracellular acid–base status as a function of

- temperature in the anuran amphibians *Xenopus laevis* and *Bufo marinus*. *J. exp. Biol.* **130**, 13–25.
- BOUTILIER, R. G., RANDALL, D. J., SHELTON, G. AND TOEWS, D. P. (1979). Acid–base relationships in the blood of the toad, *Bufo marinus*. *J. exp. Biol.* **82**, 331–334.
- BOUTILIER, R. G. AND TOEWS, D. P. (1977). The effect of progressive hypoxia on respiration in the toad, *Bufo marinus*. *J. exp. Biol.* **68**, 99–107.
- BRANCO, L. G. S., GLASS, M. L. AND HOFFMANN, A. (1992). Central chemoreceptor drive to breathing in unaesthetized toads, *Bufo paracnemis*. *Respir. Physiol.* **87**, 195–204.
- BRANCO, L. G. S., GLASS, M. L., WANG, T. AND HOFFMANN, A. (1993). Effect of temperature on central chemoreceptor drive to breathing in toads. *Respir. Physiol.* **93**, 337–346.
- COMROE, J. H. (1974). *Physiology of Respiration: An Introductory Text*. 2nd edition. Chicago: Year Book Medical Publishers, Inc.
- DEJONGH, H. J. AND GANS, C. (1969). On the mechanism of respiration in the bullfrog *Rana catesbeiana*: a reassessment. *J. Morph.* **127**, 259–290.
- FLEISCH, A. (1925). Der Pneumotachograph – ein Apparat zur Geschwindigkeitsregistrierung der Atemluft. *Plügers Arch. ges. Physiol.* **209**, 713–722.
- GARLAND, R. J., KINKEAD, R. AND MILSOM, W. K. (1994). The ventilatory response of rodents to changes in arterial oxygen content. *Respir. Physiol.* **96**, 199–211.
- GAUTIER, H. AND BONORA, M. (1983). Ventilatory response of intact cats to carbon monoxide hypoxia. *J. appl. Physiol.* **55**, 1064–1071.
- GAUTIER, H., BONORA, M. AND ZAOUÏ, D. (1990). Effects of carotid denervation and decerebration on ventilatory responses to CO. *J. appl. Physiol.* **69**, 1423–1428.
- GLASS, M. L., WOOD, S. C. AND JOHANSEN, K. (1978). The application of pneumotachography on small unrestrained animals. *Comp. Biochem. Physiol.* **59A**, 425–427.
- GRENVIK, Å., HEDSTRAND, U. AND SJÖGREN, H. (1966). Problems in pneumotachography. *Acta anaesth. scand.* **10**, 147–155.
- HOBBS, A. F. T. (1967). A comparison of methods of calibrating the pneumotachograph. *Brit. J. Anaesth.* **39**, 899–907.
- ISHII, K., HONDA, K. AND ISHII, K. (1966). The function of the carotid labyrinth in the toad. *Tohoku J. exp. Med.* **88**, 103–116.
- ISHII, K., ISHII, K. AND KUSAKABE, T. (1985). Chemo- and baroreceptor innervation of the aortic trunk of the toad *Bufo vulgaris*. *Respir. Physiol.* **60**, 365–375.
- JONES, R. M. (1982). How toads breathe: control of air flow to and from the lung by the nares in *Bufo marinus*. *Respir. Physiol.* **49**, 251–265.
- KRUHÖFFER, M., GLASS, M. L., ABE, A. S. AND JOHANSEN, K. (1987). Control of breathing in an amphibian *Bufo paracnemis*: effects of temperature and hypoxia. *Respir. Physiol.* **69**, 267–275.
- LAHIRI, S. (1994). Chromophores in O<sub>2</sub> chemoreception: The carotid body model. *News physiol. Sci.* **9**, 161–164.
- LAHIRI, S., MULLIGAN, E., NISHIRO, T., MOKASHI, A. AND DAVIES, R. O. (1981). Relative responses of aortic body and carotid body chemoreceptors to carboxyhemoglobinemia. *J. appl. Physiol.* **50**, 580–586.
- LÓPES-BARNEO, J., BENOT, A. R. AND UREÑA, J. (1993). Oxygen-sensing and electrophysiology of arterial chemoreceptor cells. *News physiol. Sci.* **8**, 191–195.
- LÓPES-LÓPES, J. R., GONZALES C., UREÑA J. AND LÓPES-BARNEO, J. (1989). Low P<sub>O<sub>2</sub></sub> selectively inhibits K channel activity in chemoreceptor cells of the mammalian carotid body. *J. gen. Physiol.* **93**, 1001–1015.
- MILLS, W. K. AND EDWARDS, M. W. (1968). Stimulation of aortic and carotid chemoreceptors during carbon monoxide inhalation. *J. appl. Physiol.* **25**, 494–502.
- SANTIAGO, T. V. AND EDELMAN, N. H. (1976). Mechanism of the ventilatory response to carbon monoxide. *J. clin. Invest.* **57**, 977–986.
- SHELTON, G. AND BOUTILIER, R. G. (1982). Apnoea in amphibians and reptiles. *J. exp. Biol.* **100**, 245–273.
- SIGGAARD-ANDERSEN, O. (1976). *The Acid–Base Status of the Blood*. 4th edition. Copenhagen: Munksgaard.
- SMATRESK, N. J. AND SMITS, A. W. (1991). Effects of central and peripheral chemoreceptor stimulation on ventilation in the marine toad, *Bufo marinus*. *Respir. Physiol.* **83**, 223–238.
- SMITH, F. M. AND JONES, D. R. (1982). The effect of changes in blood oxygen carrying capacity on ventilation volume in the rainbow trout (*Salmo gairdneri*). *J. exp. Biol.* **97**, 325–334.
- SNYDER, S. H. (1992). Nitric oxide: first of a new class of neurotransmitters? *Science* **257**, 494.
- TSCHORN, R. R. AND FEDDE, M. R. (1974). Effects of carbon monoxide on avian intrapulmonary carbon dioxide-sensitive receptors. *Respir. Physiol.* **20**, 303–311.
- TUCKER, V. A. (1967). Method for oxygen content and dissociation curves on microliter blood samples. *J. appl. Physiol.* **23**, 410–414.
- VAN VLIET, B. N. AND WEST, N. H. (1992). Functional characteristics of arterial chemoreceptors in an amphibian (*Bufo marinus*). *Respir. Physiol.* **88**, 113–127.
- WANG, T., BRANCO, L. G. S. AND GLASS, M. L. (1994). Ventilatory responses to hypoxia in the toad *Bufo paracnemis* before and after a decrease in haemoglobin oxygen-carrying capacity. *J. exp. Biol.* **186**, 1–8.
- WOOD, S. C. AND MALVIN, G. M. (1991). Physiological significance of behavioral hypothermia in hypoxic toads (*Bufo marinus*). *J. exp. Biol.* **159**, 203–215.
